# Supplementary material
Source: HighWire-hosted journal article supplement (https://bmjopen.bmj.com/content/10/9/e038730)
Supplement: inline-supplementary-material-1 [file inline-supplementary-material-1.pdf]

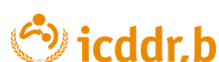
**ICDDR,B SURVEILLANCE ACTIVITY, CRSC, DHAKA, BANGLADESH**

Patient's Name : \_\_\_\_\_ Father/Husband's name : \_\_\_\_\_

**Variables**
**Code**

1. Case Number

|  |  |  |  |  |  |  |
|--|--|--|--|--|--|--|
|  |  |  |  |  |  |  |
|--|--|--|--|--|--|--|

2. Interviewer

|  |
|--|
|  |
|--|

3. Date

|  |  |  |  |  |  |
|--|--|--|--|--|--|
|  |  |  |  |  |  |
|--|--|--|--|--|--|

Day      Month      Year

4. Age

|  |  |  |  |  |  |
|--|--|--|--|--|--|
|  |  |  |  |  |  |
|--|--|--|--|--|--|

Year      Month      Day

5. Sex

1=Male, 2 = Female

|  |
|--|
|  |
|--|

6. Religion

 1= Muslim, 2=Hindu, 3=Christan,  
4=Buddist, 5= Others.

|  |
|--|
|  |
|--|

7. Use of replacement Fluid before arrival

 0=None, 1=ORS Packet, 2=Home made ORS,  
3=Barley, 4=Rice/Gruel soup, 5=I.V. fluid,  
6=1/2+4, 7=1/2+5, 8=3/4+5

|  |
|--|
|  |
|--|

8. Chemotherapy before arrival:

 0=None, 01=Penicillin, 02=Tetra, 03=Ampi  
04=Chlo 05=Furox, 06=Genta, 07=Sept, 08=Kana  
09=Nali, 10=Metro, 11=Amp+Furox, 12=Sept+Metro,  
13=Furox+Nali, 14=Selexid, 98=Other.

|  |  |
|--|--|
|  |  |
|--|--|

9. How many persons eat from the same cooking pot

|  |  |
|--|--|
|  |  |
|--|--|

10. How many hours before onset of diarrhoea meal was taken

|  |  |
|--|--|
|  |  |
|--|--|

11. How many children &lt; 5 years of age in your family

|  |
|--|
|  |
|--|

12. How many members of your family had diarrhoea in past 7 days
13. Number o deaths in last 5 years from diarrhoea
14. Feeding (upto 3 years of age) practice  
1=BM, 2=BM+CM/PM, 3=BM+Rice/Ata Powder, 4=CM/PM,  
5=Rice/Ata gruel/powder, 6=3+4, 7=4+5, 8=Family food.
15. Education of Patient's Father  
0=None, 1=Maktab, 2=1-3 yrs. 3=4-5 yrs.  
4=6-10 yrs. 5=10-12 yrs. 6= >12 yrs.
16. Education of Patient's Mother  
(code as 15.)
17. Self education for patients (>15 years of age)  
(code as 15.)
18. Monthly Income of Household (from all sources)  
1=Upto Tk. 500, 2=501-999, 3=1000-1499, 4=1500-1999  
5=2000-2999, 6=3000-4999, 7= >5000
19. Source of Drinking water  
1=Tap, 2=TW, 3=Pond/River/Ditch, 4=1+2,  
5=1+3, 6=2+3, 7=1+2+3
20. Source of water for washing/bathing  
(Code as 19)
21. Place of defecation  
1=Sanitary, 2=Semi-sanitary, 3=Service, 4=Dughole (with ring),  
5=Open pit, 6=Hanging, 7=No fixed place
22. Used Vitamin –A capsule  
0=None, 1=Within 3 months, 2=4-5 Months,  
3=6-12 months, 4= >12 months
23. Temperature  
0=Upto 36.6 °C, 1=36.7-37.7 °C, 2=37.8-38.8 °C, 3=38.9 °C+

24. Duration of diarrhoea before arrival   
 1= <1 day, 2=1-3 days 3=4-6 days 4=7-9 days, 5=10-12 days,  
 6=12-14 days, 7=15+ days
25. Character of stool (1=Watery, 2= Non-watery)
26. Stool contents (0=Usual, 1=Mucus, 2=Blood, 3=MU+BL)
27. Number of stools in 24 hours   
 1=3-5, 2=6-10, 3=11-15, 4=15-20, 5= >20
28. Abdominal Pain (0=No, 1=Yes)
29. Vomiting in last 24 hours   
 0=No, 1= <10 times, 2=10+ times
30. History of cough with diarrhoea (in days)   
 0=None, 1=1-7, 2=8-14, 3=15-20, 4= >20 days
31. History of Measles   
 0=None, 1=Measles in past 3 months, 2=Measles in >3-6 months  
 3= Present history of night blindness, 4=Past history of night blindness  
 5=Measles + Night blindness
32. History of convulsion   
 0=None, 1=Convulsion within 12 hours,  
 2=Convulsion within 13-24 hours,  
 3=Convulsion > 24 hours
33. Other diseases (specify)
34. Since how long do you live in Dhaka city   
 0=Never, 1=<1 Yr., 2=1-2 Yrs, 3=3-5 Yrs.,  
 4= > 5 Yrs., 5=Seasonal
35. Present Location (Thana/Area)   
 1=Basti, 02=Cmmon housing area, 03=Residential area,  
 04=Village area, 05=Others

**PHYSICAL EXAMINATION**

36. Thirst

0=Normal, 1=Mild, 2=Moderate, 3=Severe (for adult)

37. General condition

0=Normal, 1=Restless, 2=Lethargic but irritable when touched,  
3=Drowsy/cold and sweating extremities, 4=Coma

38. Radial pulse

0=Normal rate & good volume, 1=Rapid & weak,  
2= Rapid & feeble/sometimes impalpable, 3=Not palpable

39. Respiration

0=Normal, 1=Faster than normal, 2=Deep &amp; Rapid

40. Clinical assessment of dehydration

0=No dehydration, 5=Some, 3=Severe

41. Convulsion (0=No, 1=Yes)

**OTHER PHYSICAL FINDINGS**

41. Vitamin A deficiency

0=Normal, 1=Conj. Xerosis, 2=Bitot spot, 3=Corneal ulcer,  
4=Keratomalacia, 5=1+2, 6=3+4, 7=Corneal scar.

43. Ear –Otitis media

0=Absent, 1=Otitis media present

44. Sore mouth

0=None, 1=Angular stomatitis, 2=Glossitis,  
3=Pharyngitis, 4=Tonsillitis

45. Lungs

0=Clear, 1=Rhonce, 2=Creptitation, 3=Both

46 Abdomen

0=Normal, sounds present  
1=Distended, sounds present  
2=Distended, sounds present sluggish  
3=Distended , sound absent  
4=Distension with tenderness

|                                                                                                                                                                |                                                                                     |
|----------------------------------------------------------------------------------------------------------------------------------------------------------------|-------------------------------------------------------------------------------------|
| 47. Liver and spleen<br>0=Not palpable, 1=Liver enlarged, 2=Spleen enlarged<br>3=Liver and spleen enlarged.                                                    | <input type="text"/>                                                                |
| 48. Rectum prolapse (0=None, 1=Yes)                                                                                                                            | <input type="text"/>                                                                |
| 49. Extremities<br>0=Odema absent, 1=Odema present                                                                                                             | <input type="text"/>                                                                |
| 50. Diagnosis<br>1=Uncomplicated diarrhoea, 2=Complicated Diarrhoea<br>(Note: Complicated diarrhoea admitted in medical ward)                                  | <input type="text"/>                                                                |
| 51. Disposition<br>1=Discharge from examination desk, 2=ORP,<br>3=TC, 4=TC to Ward, 5=Ward 6=Study ward,<br>7=Referred to another hospital, 8=Death on arrival | <input type="text"/>                                                                |
| 52 Duration of stay (Days/hour)                                                                                                                                | <input type="text"/> <input type="text"/> <input type="text"/> <input type="text"/> |
| 53. Outcome<br>1=Cured, 2=Illness continuing, 3=Died,<br>4=Absconded, 5=Others.                                                                                | <input type="text"/>                                                                |
| 54. Rehydration Method used<br>0=None, 1=ORS, 2=IV only, 3=ORS to IV,<br>4=IV to ORS, 5=Others                                                                 | <input type="text"/>                                                                |
| <b>TREATMENT</b>                                                                                                                                               |                                                                                     |
| 55. 0=No medicine, 1=One medicine, 2=Two medicine, so on                                                                                                       | <input type="text"/>                                                                |
| 56. Tetracycline (0=No, 1=Yes)                                                                                                                                 | <input type="text"/>                                                                |
| 57. Ampicillin (0=No, 1=Yes)                                                                                                                                   | <input type="text"/>                                                                |
| 58. Septrin (0=No, 1=Yes)                                                                                                                                      | <input type="text"/>                                                                |
| 59. Furoxone (0=No, 1=Yes)                                                                                                                                     | <input type="text"/>                                                                |
| 60. Penicillin/Crystapen V (0=No, 1=Yes)                                                                                                                       | <input type="text"/>                                                                |
| 61. Metronidazole (0=No, 1=Yes)                                                                                                                                | <input type="text"/>                                                                |
| 62. Gentamycine (0=No, 1=Yes)                                                                                                                                  | <input type="text"/>                                                                |

63. *Nalidixic acid* (0=No, 1=Yes)

☐

64. Chloramphenicol (0=No, 1=Yes)

☐

65. Others (0=No, 1=Yes)

☐

66. Weight on Admission in Kg (1 decimal)

|  |  |  |
|--|--|--|
|  |  |  |
|--|--|--|

67. Weight on Discharge in Kg (1 decimal)

|  |  |  |
|--|--|--|
|  |  |  |
|--|--|--|

68. Height in cm (1 decimal)

|  |  |  |
|--|--|--|
|  |  |  |
|--|--|--|

69. Arm Circumference (1 decimal)

|  |  |  |
|--|--|--|
|  |  |  |
|--|--|--|

70. Azithromycin (0=No, 1=Yes)

☐

71. Amikacin (0=No, 1=Yes)

☐

72. Carbenicillin (0=No, 1=Yes)

☐

73. Ciprofloxacin (0=No, 1=Yes)

☐

74. Ceftriaxone (0=No, 1=Yes)

☐

75. Ceftazidime (0=No, 1=Yes)

☐

76. Erythromycin (0=No, 1=Yes)

☐

77. Flucloxacillin (0=No, 1=Yes)

☐

78. Imipenam (0=No, 1=Yes)

☐

79. Nitrofurantoin (0=No, 1=Yes)

☐

80. Tobramycin (0=No, 1=Yes)

☐

81. Selexid (0=No, 1=Yes)

☐

82. Doxycycline (0=No, 1=Yes)

☐

83. MagSO<sub>4</sub> (0=No, 1=Yes)

☐

**ICDDR,B SURVEILLANCE ACTIVITY (ADDITIONAL QUESTIONNAIRE)**

1. Case Number 

|  |  |  |  |  |  |  |
|--|--|--|--|--|--|--|
|  |  |  |  |  |  |  |
|--|--|--|--|--|--|--|
2. Date of interview 

|  |  |  |  |  |  |
|--|--|--|--|--|--|
|  |  |  |  |  |  |
|--|--|--|--|--|--|
3. Total distance covered (miles) 

|  |  |  |  |
|--|--|--|--|
|  |  |  |  |
|--|--|--|--|
4. Total time taken to reach (Hour/minutes) 

|  |  |  |  |
|--|--|--|--|
|  |  |  |  |
|--|--|--|--|
5. Birth order of the child (< 5 years)  
1st=01, 2<sup>nd</sup>=02, Adopted =88 

|  |  |
|--|--|
|  |  |
|--|--|
6. Any diarrhoea of this child in last 7 days, other than this episode (1=Yes, 2=No) 

|  |
|--|
|  |
|--|
7. Any diarrhoea of this child in last 14 days, other than above episode (1=Yes, 2=No) 

|  |
|--|
|  |
|--|
8. Any diarrhoea of this child in last 1 month, other than above episode (1=Yes, 2=No) 

|  |
|--|
|  |
|--|
9. any cough/fever/sneezing/running nose/rapid resp./breathing difficulty/ear discharge/husky voice in last 14 days (1=Yes, 2=No) 

|  |
|--|
|  |
|--|
10. Any other disease of this child in last 7 days (1=Yes, 2=No) 

|  |
|--|
|  |
|--|
11. Any other disease of this child in last 14 days (1=Yes, 2=No) 

|  |
|--|
|  |
|--|
12. Any other disease of this child in last 1 month (1=Yes, 2=No) 

|  |
|--|
|  |
|--|
13. Father's Age (If respondent <= 15 years of Age)  
Not applicable = 99 

|  |  |
|--|--|
|  |  |
|--|--|
14. Mother's Age (If respondent <= 15 years of Age)  
Not applicable = 99 

|  |  |
|--|--|
|  |  |
|--|--|
15. Floor structure 

|  |
|--|
|  |
|--|

  
1=Cemented, 2=Non-cemented

16. Wall structure   
 1=Brick, 2=Bamboo fence, 3=Ordinary tin, 4=Corroged tin,  
 5=Straw, 6=Jute stick, 7=Mixed, 8=Mud, 9=Other
17. Roof structure   
 1=Concrete/Pucca, 2=Bamboo fence, 3=Ordinary tin, 4=Corroged tin,  
 5=Straw, 6=Polythene, 7=Mixed, 8=Mud, 9=Other
- IMMUNIZATION HISTORY : (Children < 5 years)**
18. BCG given   
 1=Yes, 2=No, 3=Don't know, 9=NA
19. DPT given   
 1=IST dose, 2=Ist+ 2<sup>nd</sup> dose, 3=Ist+2<sup>nd</sup>+3<sup>rd</sup> dose  
 4=Not given, 5=Don't know
20. Polio given (Code as 19.)
21. Measles given   
 1=Yes, 2=No, 3=Don't know, 9=NA
22. Is the child breastfed now (< 5 years)   
 1=Yes, 2=No, 9=NA
23. If yes, frequency of breastfeeding from 6 A.M. to 6 P.M.  
 (Adopted child=88, NA=99)
24. How long did you predominantly breastfeed the child (months)  
 (<3 years of child) 00=<1 month, 01=1 month,... ,  
 adopted child=88, NA=99
25. At what age, did you stop breastfeeding (totally) your child (months)  
 (< 5 years) (< 1 month=00, 1 month=01, adopted child=88, NA=99)
26. Primari occupation of father (<=15 years of child ) or self employment  
 of the patient (>15 years)    
 1=Farmer, 2=Day labor 3=share cropper, 4=Rickshaw /Push cart puller  
 5=Taxi/Bus/truck/Tempo driver, 6=Mill/Industry worker, 7=Skill worker,  
 8=Office non-executive, 9=Office executive, 10=Petty business,  
 11=Big business, 12=Overseas employment, 13=Boatman, 14=Fisherman,  
 15=Unemployed, 16=Absent, 17=Dead, 18=Begger, 19=Street vendor,  
 20=Other
27. Any gainful employment of mother (<15 years of child) or self  
 Employment of female patient (>15 years) 1=Yes, 2=No, 9=NA



|                                                                                                                                 |                      |                      |                      |                      |                      |                      |
|---------------------------------------------------------------------------------------------------------------------------------|----------------------|----------------------|----------------------|----------------------|----------------------|----------------------|
| 28. Income of Father (Last month) in Taka<br>(<15 years of child) or self income (male patient)<br>(>15 years), NA=999999       | <input type="text"/> |
| 29. Income of Mother (Last month) in Taka<br><br>(<15 years of child) or self income (female patient)<br>(>15 years), NA=999999 | <input type="text"/> |
| 30. Mother reads newspaper (<15 years of child) or she reads<br>(>15 years) 1=Yes, 2=No, 9=NA                                   | <input type="text"/> |                      |                      |                      |                      |                      |
| 31. If yes, how many days in a week<br>(1= 7 days in a week 2=< 7 days in a week, 9=NA                                          | <input type="text"/> |                      |                      |                      |                      |                      |
| 32. Mother watches TV (<15 years of child) or she watches TV<br>(>15 years) 1=Yes, 2=No, 9=NA                                   | <input type="text"/> |                      |                      |                      |                      |                      |
| 33. If watches, how many days in a week<br>(1= 7 days in a week 2=< 7 days in a week, 9=NA                                      | <input type="text"/> |                      |                      |                      |                      |                      |
| 34. Mother listens Radio (<15 years of child) or she listens<br>(>15 years) 1=Yes, 2=No, 9=NA                                   | <input type="text"/> |                      |                      |                      |                      |                      |
| 35. If listens, how many days in a week<br>(1= 7 days in a week 2=< 7 days in a week, 9=NA                                      | <input type="text"/> |                      |                      |                      |                      |                      |
| 36. Father reads newspaper (<15 years of child) or he reads<br>(>15 years) 1=Yes, 2=No, 9=NA                                    | <input type="text"/> |                      |                      |                      |                      |                      |
| 37. If yes, how many days in a week<br>(1= 7 days in a week 2=< 7 days in a week, 9=NA                                          | <input type="text"/> |                      |                      |                      |                      |                      |
| 38. Father watches TV (<15 years of child) or he watches TV<br>(>15 years) 1=Yes, 2=No, 9=NA                                    | <input type="text"/> |                      |                      |                      |                      |                      |
| 39. If watches, how many days in a week<br>(1= 7 days in a week 2=< 7 days in a week, 9=NA                                      | <input type="text"/> |                      |                      |                      |                      |                      |
| 40. Father listens Radio (<15 years of child) or he listens<br>(>15 years) 1=Yes, 2=No, 9=NA                                    | <input type="text"/> |                      |                      |                      |                      |                      |
| 41. If listens, how many days in a week<br>(1= 7 days in a week 2=< 7 days in a week, 9=NA                                      | <input type="text"/> |                      |                      |                      |                      |                      |

42. Mother member of any cooperative ( $\leq 15$  years) society,  
NGO/Women organisation or she herself ( $>15$  years)

1=Yes, 2=No, 9=NA

43. If yes, Name of that : \_\_\_\_\_

44. Father member of any cooperative ( $\leq 15$  years) society,  
NGO/Women organisation or she herself ( $>15$  years)

1=Yes, 2=No, 9=NA

45. If yes, Name of that : \_\_\_\_\_

46. Main source of water :

|              | Distance from Kitchen (ft)                                     | # of Family User                          | Frequency of collection                   |
|--------------|----------------------------------------------------------------|-------------------------------------------|-------------------------------------------|
| 46. Drinking | <input type="text"/> <input type="text"/> <input type="text"/> | <input type="text"/> <input type="text"/> | <input type="text"/> <input type="text"/> |
| Cooking      | <input type="text"/> <input type="text"/> <input type="text"/> | <input type="text"/> <input type="text"/> | <input type="text"/> <input type="text"/> |
| Washing      | <input type="text"/> <input type="text"/> <input type="text"/> | <input type="text"/> <input type="text"/> | <input type="text"/> <input type="text"/> |

47. Any treatment of drinking water

0=None, 1=boiling, 2=Alum/tablet,, 3=Sieving,  
4= Use filter, 5=Other.

48. Years of schooling of father (read upto)

49. Years of schooling of mother (read upto)

50. Number of rooms in the family

51. Number of beds in the family

52. Family owns fan (1=Yes, 2=No)

53. Family owns radio (1=Yes, 2=No)

54. Family owns TV (1=Yes, 2=No)

55. Family owns Almirah (1=Yes, 2=No)

56. Family owns luxury cot (1=Yes, 2=No)

57. Family owns ordinary cot (1=Yes, 2=No)

58. Family uses gas for cooking (1=Yes, 2=No)
59. Cooks in the bedroom (1=Yes, 2=No)
60. Use of light at night (1=Electrical, 2=Ordinary kerosine lamp  
3=Hurricane, 4=2+3, 5=None).
61. Keeps chicken/Duck in   
Bedroom=1, Courtyard=2, Corridor=3, Other places=4  
More than one places=5, NA=9
62. Chicken/ducks enter in kitchen (1=Yes, 2=No, 9=NA)
63. Chicken/ducks enter in bedroom (1=Yes, 2=No, 9=NA)
64. Keeps pigeon/birds in   
Bedroom=1, Courtyard=2, Corridor=3, Other places=4  
More than one places=5, NA=9
65. Pigeon/birds enter in kitchen (1=Yes, 2=No, 9=NA)
66. Pigeon/birds enter in bedroom (1=Yes, 2=No, 9=NA)
67. Keeps Cows/goats/dogs/cats in   
Bedroom=1, Courtyard=2, Corridor=3, Other places=4  
More than one places=5, NA=9
68. Cows/goats/dogs/cats enter in kitchen (1=Yes, 2=No, 9=NA)
69. Cows/goats/dogs/cats enter in bedroom (1=Yes, 2=No, 9=NA)
70. Disposal of garbage (1=Courtyard 2=Outside the house)
71. Number of cigarettes smoked by father per day (< 15 years)    
None=00, Unknown=88, NA=99
72. Number of cigarettes smoked by mother per day (< 15 years)    
None=00, Unknown=88, NA=99
73. Number of cigarettes smoked by patient per day (> 15 years)    
None=00, Unknown=88, NA=99
74. Number of biri/hukka smoked by father per day (< 15 years)    
None=00, Unknown=88, NA=99

75. Number of biri/hukka smoked by mother per day (< 15 years)  
None=00, Unknown=88, NA=99

|  |  |
|--|--|
|  |  |
|--|--|

76. Number of biri/hukka smoked by patient per day (< 15 years)  
None=00, Unknown=88, NA=99

|  |  |
|--|--|
|  |  |
|--|--|

77. Since how long do you live in the same house (if rented)  
< 1 year=00, One year=01, 2 year=02 ... 10+ year=10, NA=99

|  |  |
|--|--|
|  |  |
|--|--|

78. Since how long do you live in the same house (if Own house)  
< 1 year=00, One year=01, 2 year=02 ... 10+ year=10, NA=99

|  |  |
|--|--|
|  |  |
|--|--|

79. Admission weight in Kg (2 decimal)

|  |  |  |  |
|--|--|--|--|
|  |  |  |  |
|--|--|--|--|

80. Discharge weight in Kg (2 decimal)

|  |  |  |  |
|--|--|--|--|
|  |  |  |  |
|--|--|--|--|

81. Admission height in cm (1 decimal)

|  |  |  |  |
|--|--|--|--|
|  |  |  |  |
|--|--|--|--|

82. Discharge height in cm (1 decimal)

|  |  |  |  |
|--|--|--|--|
|  |  |  |  |
|--|--|--|--|

83. MUAC in cm (1 decimal)

|  |  |  |
|--|--|--|
|  |  |  |
|--|--|--|

84. Tibial length (1 decimal)

|  |  |  |
|--|--|--|
|  |  |  |
|--|--|--|

85. Duration of diarrhoea prior to admission  
(days/hour) persistent diarrhoea = 15+ days

|  |  |  |  |
|--|--|--|--|
|  |  |  |  |
|--|--|--|--|

86. Stool specimen collected  
1=Yes, 2=No, 3=R/S

|  |
|--|
|  |
|--|

87. Number of school going children in the family

|  |
|--|
|  |
|--|

88. Currently pregnant or not  
(1=Yes, 2= No, 9=NA)

|  |
|--|
|  |
|--|

89. Duration of pregnancy (weeks)  
99=NA

|  |  |
|--|--|
|  |  |
|--|--|
